# Supplementary material
Source: Research Square preprint supplement (doi:10.21203/rs.3.rs-9107828/v1)
Supplement: Supplementary file 1 [file b5a4f7b44b1f22b6f24180cb.docx]

**The effective size of the Scandinavian wolf population is too small for both short- and long-term conservation**

**Supporting information**

**Comparing Ne from simulations to the pedigree-based Ne**

When *Ne*/*Nc* ratios are considered, the census size *Nc* ideally reflects the number of potential parents in a population (Waples 2022). In the Scandinavian population, however, also juveniles and yearling individuals are included in the census size, yielding *Ntot* rather than *Nc* (Milleret et al. 2025), and *Ntot*  is multiplied by 0.25 to yield the expected *Ne*, which we call the “Forslund *Ne”*. Consider that the unit of reproduction is a pack, which typically consists of a breeding pair with offspring aged 0-2 (Mech & Boitaini 2003). We can calculate *Ne* from the annual cohort size (*N1*) when we know the mean and variance *Vk* in lifetime reproductive success and the generation interval *T* using the following equation (Hill 1972, 1979)

(S1)

In an ideal population, generations are discrete (so T=1) and =*VK*=2, and as a result *Ne* *N1 =Nc*. In iteroparous species, however, *VK* > (because some individuals live longer than others and have more opportunities to reproduce) and *Ne* is typically much smaller than *Nc* (reviewed in Waples 2024a). For the *Ne*/*Ntot* conversion ratio of 0.25 to be correct, 50 packs (*Nc*=100 reproductively active males and females, *Ntot* = 500 wolves all ages confounded) (Svensson et al. 2025) would need to have an effective size *Ne*=125. This necessarily means the population’s effective size *Ne* would exceed the adult census size of reproductive individuals, *Nc*. Even if we include 50% scent-marking pairs (which are typically newly formed pairs that reproduce the next year), *Nc* would be approximately 150 and the *Ne*/*Nc* ratio would be 0.83. Either value is rather unlikely in any natural population, requiring scrutiny.

Simulations by Bruford (2015), Dussex (2024) and Miller (2024) rely on input parameters of fecundity, annual survival rates per age class, fitness costs of inbreeding on the viability of the population, the change in inbreeding and the change in genetic diversity. Since these simulations provide expected values of gene diversity (*He*) across different periods as emergent properties of the simulations, we can use these data to calculate the emergent inbreeding effective size *Nei* in these simulations, using ) (S2; Crow and Kimura 1970) with *t* the number of generations, and *H0* the gene diversity or nucleotide diversity at onset (*t*=0). By comparing this to the empirical, pedigree-based *Ne* values from our own study, we can gauge to what extent these simulations reflect the observed population properties, and thus provide realistic population trajectories in the simulations.

We can then compare the *Ne* emerging from simulations in the absence of gene flow (*Nex* in Ryman et al. 2019), as that is also the *Ne* that we calculated from *K* and *VK* and which pertains to the *Ne*/*Nc* ratio, and also compare other emerging properties such as age distribution and *Nt*ot/*Npacks*.

Forslund (2008) in Liberg et al. (2009) provided a first population viability analysis, in which model parameter settings (life span, mean litter size, survival per age class, …) were derived from empirical data from radio-collared wolves (Nilsson 2004). Forslund modelled populations with an equilibrium size of 230 and 400 wolves (*Ntot*), and found a change in inbreeding *F* corresponding to effective sizes of 55 and 97, respectively, in the absence of immigration. The resulting *Ne/Ntot* ratio of 0.24 - 0.25 has been a recurrent assumption in multiple ensuing studies, but its validity was never verified empirically.

Bruford (2015) further performed simulations on the basis of the Nilsson (2004) life history settings. Whereas the ratio of the number of packs to *Ntot* is defined as 1/10 in the Scandinavian wolf population (Åkesson et al. 2023), Bruford (2015) assumed 6 wolves per pack (consisting of 2 adults, 2 individuals age 1-2 and 2 individuals age 0-1), and did not include solitary individuals or territorial pairs. Yet these can make up 45% of the population size (Svensson et al. 2023). Hence a population containing 33 packs would consist of circa 330 wolves in reality, whereas they were modelled as having a census size of only 200. Extrapolating his simulation results, Bruford calculated for the 2015 population (*Npacks*=48, *Ntot*=480 according to standard conversions in Scandinavia) that the effective size was between 80 and 130, which is 1.5 to 2.5 times higher than the life-history based values reported here. Monitoring data confirm that Bruford (2015) overestimated the number of reproductive units and hence the *Ne*: over the past 4 years the Scandinavian population has fluctuated around *Ntot*=500 wolves, consisting on average of 180 adults: 100 reproductively active individuals (50 family groups), 62 non-reproductive paired individuals and circa 10% solitary adults (Svensson et al. 2023). For 100 reproductively active individuals to have *Ne*=80-130, the population would need to behave like an ideal theoretical population (*Ne*=*Nc*) with a variance in reproductive success that is unrealistically low.

Dussex (2024) also simulated different intricate scenarios of demographic and genetic change for the Scandinavian population. He reported in the absence of gene flow for a mean population size of 210 wolves (*Ntot*=210) a decrease in gene diversity over 100 years (33.3 generations, as he assumed a generation interval of only 3 years) of 16%, and of 10% for *Ntot*=310. Plugged into equation S2, these genetic changes correspond to effective sizes of *Ne*=95 for a population of 210 wolves, and of *Ne*=157 for a population of 310 wolves. These emerging *Ne* values are 4 times larger than the observed pedigree-based values for corresponding *Ntot* values (Table 1 in the main text), and represent a *Ne/Nc* ratio that is biologically unattainable, even in actively managed captive populations. Our resulting pedigree-based *Ne*/*Ntot* for Scandinavian wolves is on average 0.12. At *Ntot*=210, the *Ne* would be 25 (instead of 95 in Dussex 2024), at *Ntot*=310 *Ne* would be 37 (instead of 157). Similar input parameters were used by Miller (2024) for population viability analyses. It therefore seems that none of these simulations are a realistic representation of the actual Scandinavian population.

The reason for this discrepancy may partly lie in the demographic parameters used by Bruford (2015), Dussex (2024) and Miller (2024): with simulated mortality rates of 0.30, 0.40 and 0.25 for ages 1, 2 and older, the age distribution is skewed towards adults: a population of 500 wolves with the Dussex (2024) parameters consists of 48% adults (*Nc*=240), with on average 73 packs and 47 scent-marking pairs and solitary individuals. This inflates the number of packs by nearly 50% relative to observed data (Svensson et al. 2023), and therefore also inflates the *Ne* of the population: a population of 500 Scandinavian wolves consists on average of 50 packs, not 73.

Next to that, the true variance in lifetime reproductive success is likely much larger than simulated by Dussex (2024) and Miller (2024): in the simulations the variance is an emergent property of the model and its input parameters, and only originates from inbreeding and differences in longevity. In reality the variance in lifetime reproductive success may be larger due to other external factors unknown (disease, poaching, culling, family-correlated survival due to habitat patch quality… (Planillo et al. 2024, Waples 2024a, 2025). In order to have for a population size of *Ntot*=210 with 31 packs (emergent from the Dussex simulations) an effective size of 95, the variance in reproductive success needs to be 0.6, which is much smaller than in an ideal theoretical population (=*Vk*=2). The pedigree-based variance in reproductive success, however, was 5.2 for males and 5.4 for females at =2. We can further see that the simulated average and standard deviation in annual litter size per pack (K=3.5 and SD=1.4 in Dussex 2024; K=5.3 and SD=1.5 in Miller 2024), is also considerably different from empirical data from the German population (K=4.04, SD=2.05) (Mergeay et al. 2024). Especially the smaller standard deviation increases the *Ne/Nc* of the simulated populations, but it further ignores family-correlated survival of pups to adulthood, which is a potentially importance source of variance in reproductive success (Waples 2024b).

Overall, this comparison indicates that the parameter settings for earlier simulations do not accurately reflect the actual present-day life history traits of the Scandinavian wolf population, and that hence conclusions drawn from these studies are likely flawed.

**References**

Åkesson, M., A. Danielsson, Ø. Flagstad, and L. Svensson. 2023. Sammanställning av släktträdet över den skandinaviska vargpopulationen fram till 2022. Rapport på uppdrag av Naturvårdsverket. SLU Viltskadecenter, Grimsö.

Bruford, M. 2015. Additional Population Viability Analysis of the Scandinavian Wolf Population. Swedish Environmental Protection Agency Report 6639. Swedish Environmental Protection Agency.

Crow, J. F., and M. Kimura. 1970. An introduction to population genetics theory. Harper & Row, New York.

Dussex, N. 2024. Minimum Viable Population Analysis to inform the Favourable Reference Value for wolves in Sweden Norwegian University of Science and Technology, Trondheim, Norway.

Forslund, P. 2008. Beskattning av viltpopulationer - Modellering av den framtida skandinaviska vargpopulationen Slutrapport till Naturvårdsverket.

Liberg, O., H. Sand, P. Forslund, L. Laikre, N. Ryman, M. Åkesson, and S. Bensch. 2009. Förslag på åtgärder för att stärka den genetiska situationen för den svenska vargstammen. Ett uppdrag från Naturvårdsverket. Proposals to improve the genetic situation of the Swedish wolf population. A report for the Swedish Environmental Protection Agency. SEPA.

Mergeay, J., S. Smet, S. Collet, S. Nowak, I. Reinhardt, G. Kluth, M. Szewczyk, R. Godinho, C. Nowak, Robert W. Mysłajek, and G. Rolshausen. 2024. Estimating the Effective Size of European Wolf Populations. Evolutionary Applications **17**:e70021.

Miller, P. S. 2024. A Demographic and Genetic Analysis of Minimum Viable Population Size to Inform the Population Reference Value for Wolves in Sweden. Final Report. Swedish EPA Contract Number 365 – 23 – 002 IUCN SSC Conservation Planning Specialist Group.

Milleret, C., P. Dupont, A. Semper-Pascual, H. Brøseth, Ø. Flagstad, J. Kindberg, L. Svensson, and R. Bischof. 2025. Estimates of wolf density, abundance, and population dynamics in Sweden and Norway, 2015–2025 - MINA fagrapport 103. 36 pp., Norwegian Institute of Life Sciences (NMBU), Ås, Norway.

Nilsson, T. 2004. Integrating effects of hunting policy, catastrophic events, and inbreeding depression, in PVA simulation: the Scandinavian wolf population as an example. Biological Conservation **115**:227–239.

Planillo, A., I. Reinhardt, G. Kluth, S. Collet, G. Rolshausen, C. Nowak, K. Steyer, G. Ellwanger, and S. Kramer-Schadt. 2024. Habitat and density effects on the demography of an expanding wolf population in Central Europe. Wildlife Biology **2024**:e01246.

Ryman, N., L. Laikre, and O. Hössjer. 2019. Do estimates of contemporary effective population size tell us what we want to know? Molecular Ecology **28**:1904-1918.

Svensson, L., P. Wabakken, E. Maartmann, K. Nordli, Ø. Flagstad, A. Danielsson, H. Hensel, K. Pöchhacker, and M. Åkesson. 2023. Inventering av varg vintern 2022–2023. Bestandsovervåking av ulv vinteren 2022–2023. Bestandsstatus for store rovdyri Skandinavia. Beståndsstatus för stora rovdjur i Skandinavien 1-2023, 65p., Norway.

Svensson, L., P. Wabakken, E. Maartmann, K. Nordli, M. Ø. Jensen, C. Milleret, P. Dupont, M. Åkesson, and Ø. Flagstad. 2025. Bestandsovervåking av ulv vinteren 2024-2025. Inventering av varg vintern 2024-2025. Bestandsstatus for store rovdyr i Skandinavia. Beståndsstatus för stora rovdjur i Skandinavien 1-2025.

Waples, R. S. 2022. What Is Ne, Anyway? Journal of Heredity **113**:371-379.

Waples, R. S. 2024a. The Ne/N ratio in applied conservation. Evolutionary Applications **17**:e13695.

Waples, R. S. 2024b. Practical considerations regarding estimating Ne when generations overlap. bioRxiv.

Waples, R. S. 2025. The Idiot's Guide to Effective Population Size. Molecular Ecology **n/a**:e17670.
